# Supplementary material for: In Silico Drug Repurposing Approach: Investigation of Mycobacterium tuberculosis FadD32 Targeted by FDA-Approved Drugs
Source: MDPI journal article supplement (doi:10.3390/molecules27030668), 2022-01-20
Supplement: s1 [file s1]

## Supplementary Material

**Table S1:** Bind sites and the amino acids residues.

| Binding sites                   | Amino acids                                                                             |
|---------------------------------|-----------------------------------------------------------------------------------------|
| ATP-binding site                | Thr187, Arg192, Glu347, Arg483, Asp469, Ala346, Ile480, Tyr343, Ser342, Pro316, Ser314. |
| Meromycolate-binding site       | Val280, Met233, Ser342, Leu350, val211, Leu240, His246, Ile278, Thr237, Leu215.         |
| Phosphopantetheine-binding site | Phe284*                                                                                 |

\* Phe284 is located at the entrance of the putative pantetheine-binding tunnel of FadD32.

**Table S2:** H bonding data of the investigated drugs.

| FDA-approved drugs | Acceptor    | DonorH       | Donor        | Fra (ps) | Frac (%) | Dist (Å) | Angle (°) |
|--------------------|-------------|--------------|--------------|----------|----------|----------|-----------|
| Accolate           | PRO_194@O   | ZIN_631@H    | ZIN_631@N1   | 10357    | 0.052    | 2.88     | 156.91    |
| Sorafenib          | ZIN_631@O15 | THR_191@HG1  | THR_191@OG1  | 10811    | 0.054    | 2.74     | 159.04    |
| Mefloquine         | ZIN_631@F3  | ARG_192@HH11 | ARG_1942@NH1 | 1        | 0.000    | 2.87     | 146.31    |
|                    | GLU_437@OE1 | ZIN_631@H10  | ZIN_631@N1   | 41586    | 0.208    | 2.87     | 157.74    |
| Loperamide         | ZIN_631@O1  | ARG_192@HH22 | ARG_192@NH2  | 3936     | 0.019    | 2.87     | 154.57    |
|                    | ZIN_631@O1  | ARG_192@HH12 | ARG_192@NH1  | 2245     | 0.011    | 2.87     | 155.88    |
|                    | ZIN_631@O   | LYS_434@H    | LYS_434@N    | 16       | 0.000    | 2.93     | 154.34    |

**Fra – Frame; Frac – Fraction; Dist - Distance.**

## “Three replicas to verify the findings”

### 1. Binding free energy calculations

Table S3: Binding free energy (kcal/mol) and the components of binding free energy of the respective molecules.

| FDA-approved drugs | $\Delta G_{\text{bind}}$<br>(kcal/mol) | $\Delta E_{\text{vdw}}$<br>(kcal/mol) | $\Delta E_{\text{ele}}$<br>(kcal/mol) | $\Delta G_{\text{gas}}$<br>(kcal/mol) | $\Delta G_{\text{sol}}$<br>(kcal/mol) |
|--------------------|----------------------------------------|---------------------------------------|---------------------------------------|---------------------------------------|---------------------------------------|
| Accolate           | -45.13±6.64                            | -64.54±4.08                           | -28.89±9.70                           | -93.44±12.41                          | 48.31±6.95                            |
|                    | -54.15±6.06                            | -70.40±3.68                           | -37.67±7.86                           | -108.08±8.79                          | 53.39±4.79                            |
|                    | -48.96±3.86                            | -57.29±2.85                           | -51.00±8.22                           | -108.29±7.79                          | 59.33±4.77                            |
| Average            | -49.29±5.52                            | -63.66±3.53                           | -39.19±8.59                           | -103.27±9.66                          | 53.67±5.50                            |
|                    |                                        |                                       |                                       |                                       |                                       |
| Sorafenib          | -32.73±3.87                            | -51.64±2.92                           | -27.74±8.37                           | -73.37±8.36                           | 46.65±7.83                            |
|                    | -48.98±3.38                            | -58.71±3.19                           | -43.05±6.21                           | -101.76±6.56                          | 52.77±4.05                            |
|                    | -42.60±6.32                            | -63.78±4.82                           | -29.49±8.74                           | -93.47±11.29                          | 50.87±7.34                            |
| Average            | -41.43±4.52                            | -58.04±3.64                           | -33.42±7.77                           | -89.53±8.73                           | 50.09±6.41                            |
|                    |                                        |                                       |                                       |                                       |                                       |
| Mefloquine         | -26.84±2.63                            | -34.55±2.74                           | -23.59±6.18                           | -58.13±6.15                           | 31.29±4.97                            |
|                    | -21.13±2.93                            | -30.87±3.37                           | -12.81±6.18                           | -43.68±7.97                           | 22.54±6.43                            |
|                    | -39.61±5.77                            | -48.88±4.41                           | -37.06±8.54                           | -85.95±11.30                          | 46.33±7.26                            |
| Average            | -29.19±3.77                            | -38.10±3.51                           | -24.48±6.96                           | -62.58±8.47                           | 33.38±6.22                            |
|                    |                                        |                                       |                                       |                                       |                                       |
| Loperamide         | -21.52±7.40                            | -33.45±7.95                           | -11.37±7.48                           | -59.84±10.21                          | 28.39±6.01                            |
|                    | -36.07±3.19                            | -47.98±2.81                           | -29.29±7.48                           | -77.90±4.59                           | 41.83±3.21                            |
|                    | -20.79±4.31                            | -33.25±4.10                           | -18.11±8.05                           | -51.36±9.38                           | 30.57±7.29                            |
| Average            | -26.37±4.96                            | -38.22±4.95                           | -19.59±7.67                           | -63.03±8.06                           | 33.59±5.50                            |

## 2. Systems stability

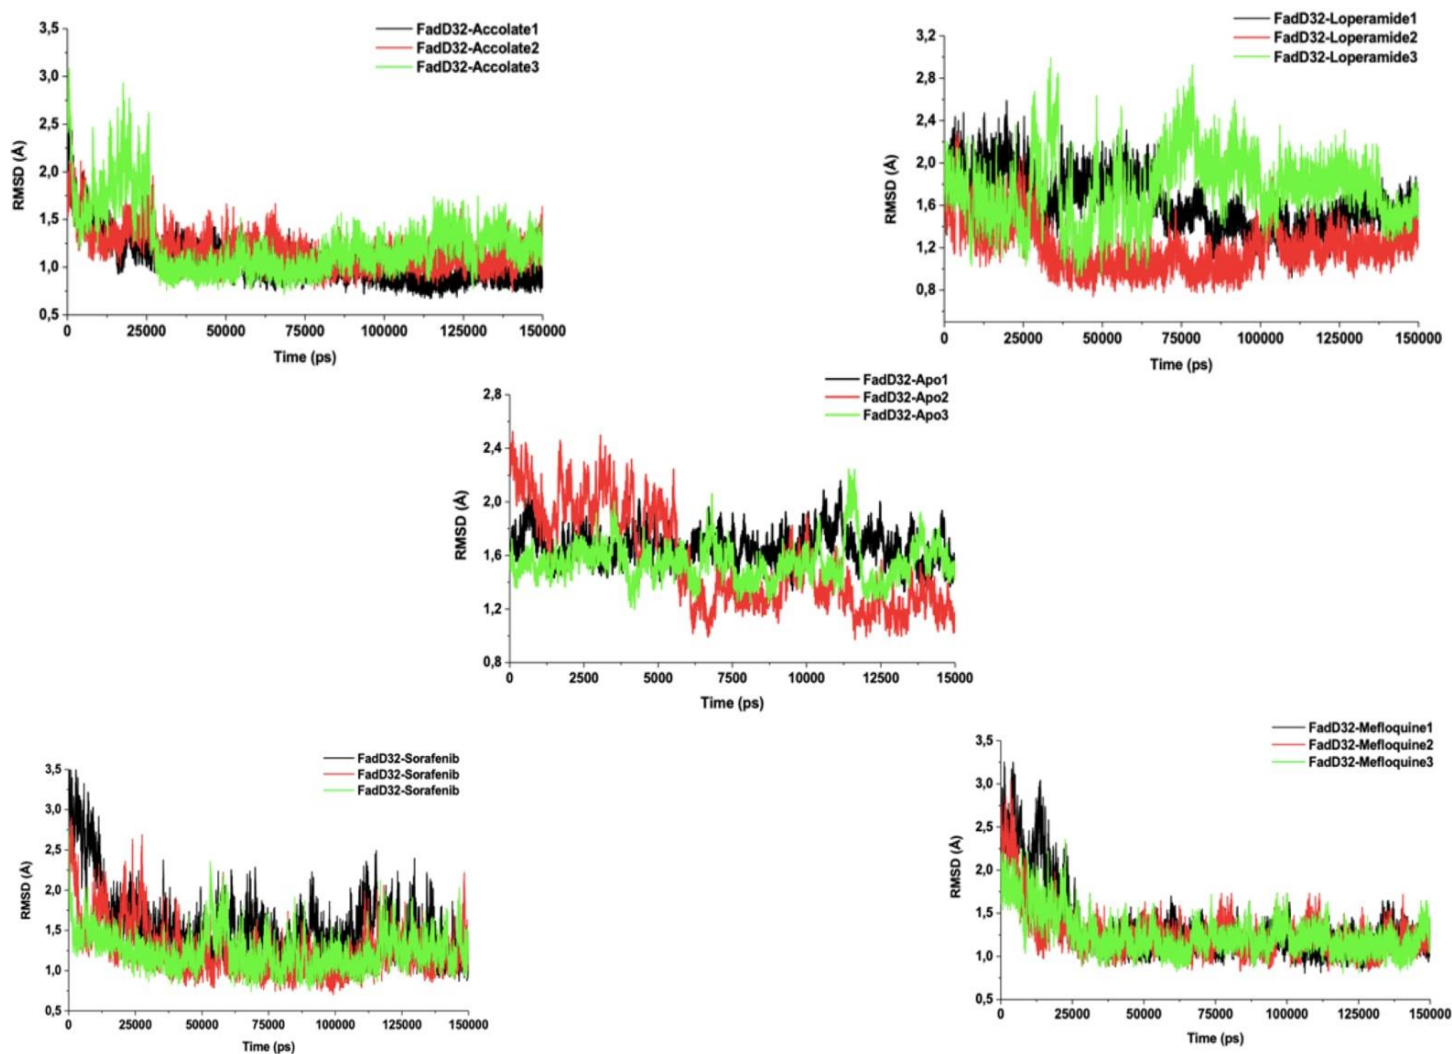

**Figure S1:** RMSD of FadD32-Apo, FadD32-Accolate, FadD32-Sorafenib, FadD32-Mefloquine and FadD32-Loperamide

**Table S4:** RMSD (Å) values and average.

|                   | #1   | #2   | #3   | Average |
|-------------------|------|------|------|---------|
| <b>APO</b>        | 1.20 | 1.36 | 1.38 | 1.31    |
| <b>Accolate</b>   | 1.05 | 1.18 | 1.24 | 1.16    |
| <b>Sorafenib</b>  | 1.56 | 1.26 | 1.25 | 1.36    |
| <b>Mefloquine</b> | 1.35 | 1.24 | 1.24 | 1.28    |
| <b>Loperamide</b> | 1.63 | 1.21 | 1.77 | 1.55    |
